# Supplementary material
Source: PubMed Central journal article supplement (PMC2781570)
Supplement: supp_M109.002832_jbc.M109.002832-1.pdf [file supp_M109.002832_jbc.M109.002832-1.pdf]

**Crowded, Cell-like Environment Accelerates the Nucleation Step of  
Amyloidogenic Protein Misfolding**

**Zheng Zhou<sup>†,1</sup>, Jun-Bao Fan<sup>†,1</sup>, Hai-Li Zhu<sup>†</sup>, Frank Shewmaker<sup>‡</sup>, Xu Yan<sup>†</sup>, Xi  
Chen<sup>†</sup>, Jie Chen<sup>†</sup>, Geng-Fu Xiao<sup>†</sup>, Lin Guo<sup>†</sup>, and Yi Liang<sup>†,2</sup>**

From the <sup>†</sup>State Key Laboratory of Virology, College of Life Sciences, Wuhan  
University, Wuhan 430072, China, and the <sup>‡</sup>Laboratory of Biochemistry and Genetics,  
National Institute of Diabetes and Digestive and Kidney Diseases, National Institutes  
of Health, Bethesda, MD 20892

Running Title: Crowding accelerates human Tau and prion protein misfolding

<sup>1</sup> These authors contributed equally to this work.

<sup>2</sup> To whom correspondence should be addressed. Tel.: 86-27-6875-4902; Fax:

86-27-6875-4902; E-mail: liangyi@whu.edu.cn.

## Supplemental Data

FIGURE S1. **Verification of phosphorylated status of Tau<sub>244-441</sub> fragment by GSK-3 $\beta$ .** SDS-PAGE profiles of non-phosphorylated and GSK-3 $\beta$  hyperphosphorylated Tau<sub>244-441</sub> fragments (A). *Lane 1*, protein molecular weight marker:  $\beta$ -galactosidase (116.0 kDa), bovine serum albumin (66.2 kDa), ovalbumin (45.0 kDa), lactate dehydrogenase (35.0 kDa), restriction endonuclease *Bsp98 I* (25.0 kDa),  $\beta$ -lactoglobulin (18.4 kDa), and lysozyme (14.4 kDa). *Lane 2* represents non-phosphorylated Tau<sub>244-441</sub> and *lane 3* represents GSK-3 $\beta$  hyperphosphorylated Tau<sub>244-441</sub>. Proteins in the gel were visualized by Coomassie Blue staining. Sequencing by tandem MS/MS in IDA mode corresponding to phosphorylated residue Ser400 in Tau<sub>244-441</sub> (B). A bivalent precursor ion was sequenced by tandem MS/MS. Phosphopeptide SPVVpSGDTSPR (Mr 1180.51; residues 396-406, precursor ion  $[M+2H]^{2+}$  with  $m/z$  590.98<sup>2+</sup>). The peptide mass and  $m/z$  of the fragment ions identify a phosphopeptide with phosphate on Ser400 of Tau<sub>244-441</sub> fragment. The y ion series (y7-y10) demonstrate that Ser400 is dehydroalanine because of the loss of phosphoric acid (98 Da) from phosphoserine in the fragmentation reaction.

FIGURE S2. **Effects of macromolecular crowding on amyloid formation of human prion protein monitored by ThT fluorescence (A) and assay of the absorbance at 400 nm (B).** The concentration of PrP was 0.25/0.125 and 0.50 mg/ml for (A) and (B) respectively. For 0.25 or 0.50 mg/ml PrP, the crowding agent

concentrations were 0 (*open square*), 50 g/l (*solid circle*), 100 g/l (*solid triangle*), and 150 g/l (*inverted solid triangle*), respectively. For 0.125 mg/ml PrP, the crowding agent concentrations were 0 (*open circle*), 100 g/l (*open triangle*), and 150 g/l (*inverted open triangle*), respectively.

**FIGURE S3. Proteinase K-digestion assays of human PrP fibrils formed in the absence of a crowding agent (A) and in the presence of 150 g/l Ficoll 70 (B).**

Human PrP fibril samples were prepared in 100 mM Tris-HCl (pH 7.5) with 0.5% Triton X-100 (*lanes 2-4 and 9-11*) or without Triton X-100 (*lanes 5-7 and 12-14*) and heated in water bath for 15 min at 80 °C, cooled down, and then incubated with PK for 1 h at 37 °C at PK/PrP molar ratios: 1:1000 (*lanes 2, 5, 9, and 12*), 1:500 (*lanes 3, 6, 10 and 13*), and 1:100 (*lanes 4, 7, 11, and 14*). The controls with zero protease in the absence of a crowding agent and in the presence of 150 g/l Ficoll 70 were loaded on *lanes 1 and 8* respectively. Amyloid fibrils were produced from human PrP incubated in the absence and presence of crowding agents for 12 h. Protein fragments were separated by SDS-PAGE and detected by silver staining.

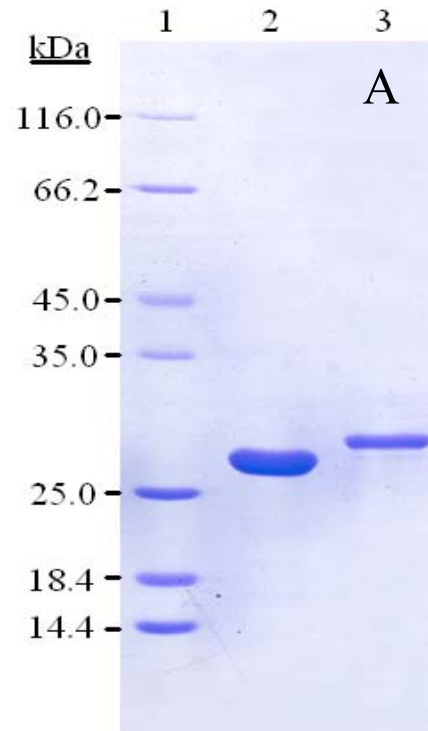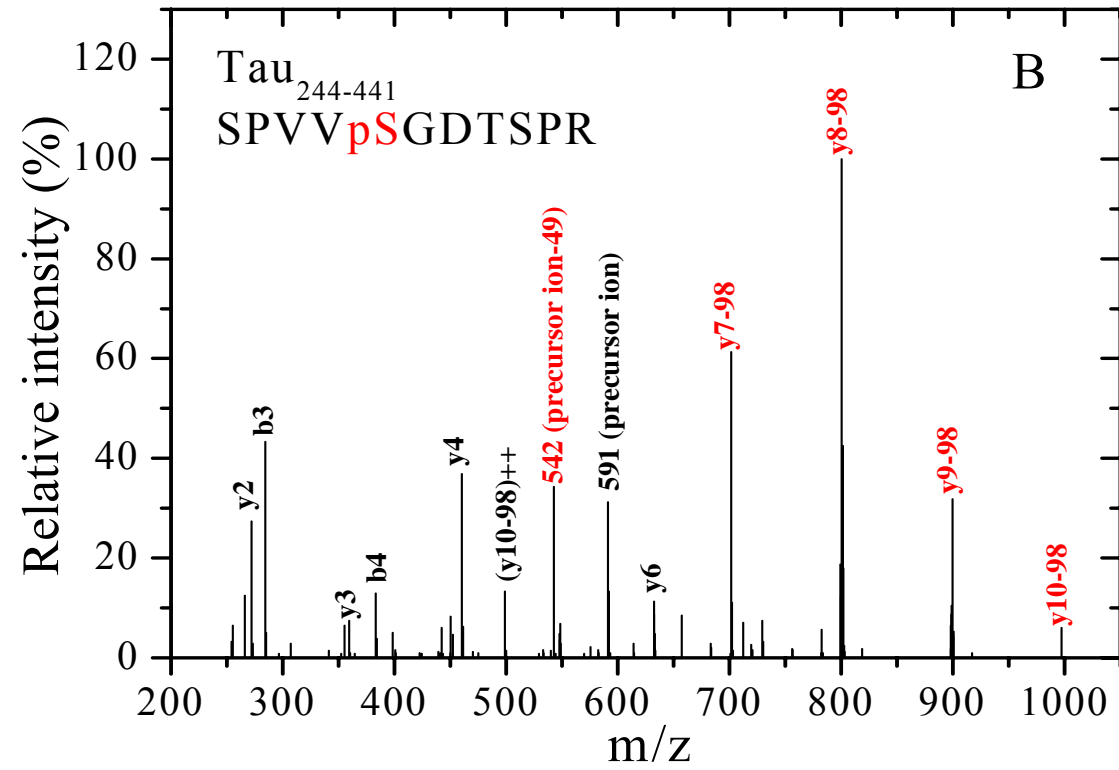

Figure S1

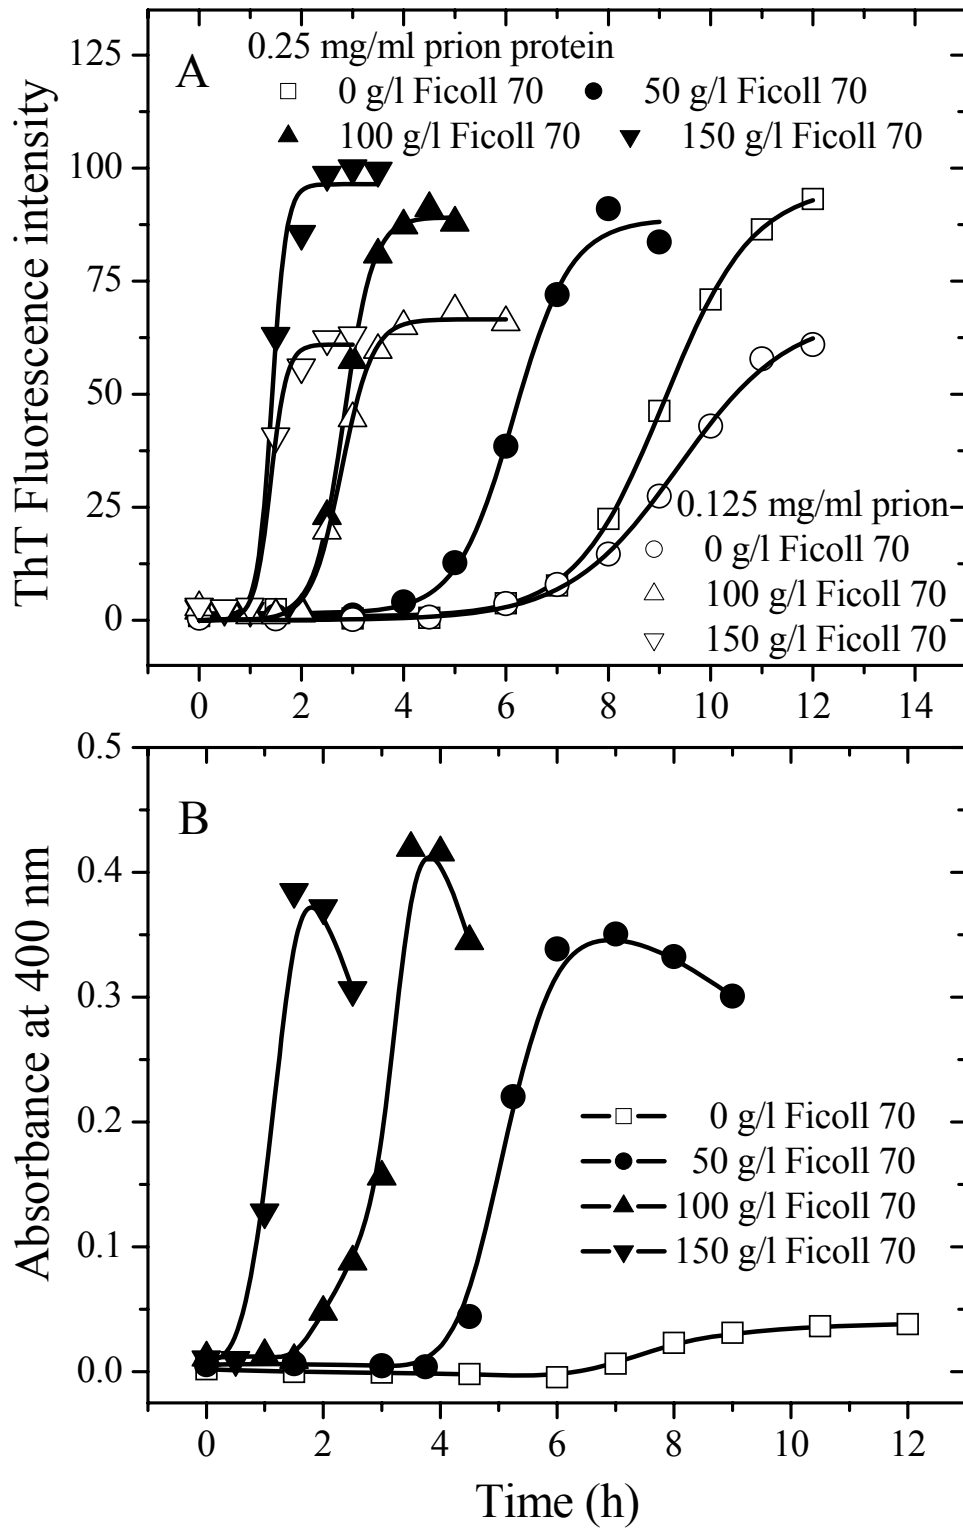

Figure S2

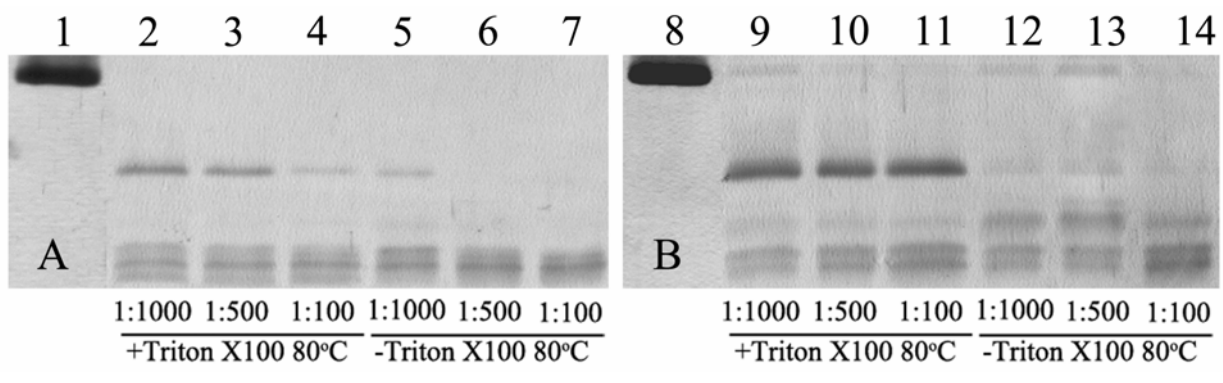

Figure S3

**TABLE S1**

**Kinetic parameters for fibril formation of human Tau fragments in the absence and in the presence of crowding agents as determined by ThT binding assays at 37 °C.** Best-fit values of these kinetic parameters were derived from non-linear least squares modeling of a sigmoidal equation as described in the “Materials and Methods” and the Hill function to the data plotted in Fig. 1. Errors shown are standard errors of the mean.

| [Crowding agent] (g/l)                     | $k$ (h <sup>-1</sup> ) | $t_m$ (h)   | Lag time (h) | $t_{50}$ (h)  | $F(\infty)$   |         |
|--------------------------------------------|------------------------|-------------|--------------|---------------|---------------|---------|
| Hyperphosphorylated Tau <sub>244-441</sub> |                        |             |              |               |               |         |
| Absence                                    | 0.23 ± 0.01            | 14.8 ± 0.3  | 6.10 ± 0.68  | 20.0 ± 1.3    | 59 ± 5        |         |
| 100                                        | 2.27 ± 0.43            | 1.52 ± 0.15 | 0.64 ± 0.32  | 2.71 ± 1.1    | 45 ± 27       |         |
| Ficoll 70                                  | 200                    | 2.13 ± 0.06 | 1.07 ± 0.01  | 0.13 ± 0.04   | 1.67 ± 0.07   | 179 ± 7 |
| 300                                        | 2.65 ± 0.04            | 0.77 ± 0.01 | 0.02 ± 0.02  | 0.98 ± 0.02   | 175 ± 4       |         |
| 100                                        | 2.34 ± 0.21            | 1.60 ± 0.08 | 0.74 ± 0.16  | 2.56 ± 0.18   | 48 ± 6        |         |
| Dextran 70                                 | 200                    | 2.01 ± 0.09 | 1.08 ± 0.02  | 0.08 ± 0.06   | 1.75 ± 0.05   | 273 ± 8 |
| 300                                        | 2.99 ± 0.07            | 0.69 ± 0.01 | 0.02 ± 0.03  | 1.02 ± 0.02   | 272 ± 5       |         |
| Non-phosphorylated Tau <sub>244-441</sub>  |                        |             |              |               |               |         |
| Crowding agent (g/l)                       | $k$ (h <sup>-1</sup> ) | $t_m$ (h)   | Lag time (h) | $t_{50}$ (h)  | $F(\infty)$   |         |
| Absence                                    | 3.07 ± 0.17            | 0.89 ± 0.02 | 0.24 ± 0.06  | 1.36 ± 0.03   | 293 ± 6       |         |
| 50                                         | 4.80 ± 0.21            | 0.68 ± 0.01 | 0.26 ± 0.03  | 0.745 ± 0.010 | 219 ± 4       |         |
| Ficoll 70                                  | 100                    | 4.76 ± 0.25 | 0.52 ± 0.01  | 0.10 ± 0.03   | 0.560 ± 0.013 | 211 ± 8 |
| 200                                        | 5.29 ± 0.25            | 0.45 ± 0.01 | 0.07 ± 0.03  | 0.492 ± 0.008 | 256 ± 8       |         |
| 50                                         | 4.28 ± 0.20            | 0.73 ± 0.01 | 0.26 ± 0.03  | 0.788 ± 0.007 | 295 ± 4       |         |
| Dextran 70                                 | 100                    | 4.62 ± 0.25 | 0.52 ± 0.01  | 0.09 ± 0.03   | 0.573 ± 0.003 | 346 ± 3 |
| 200                                        | 5.53 ± 0.27            | 0.39 ± 0.01 | 0.03 ± 0.03  | 0.440 ± 0.003 | 420 ± 6       |         |

**TABLE S2**

**Kinetic parameters for amyloid fibril formation of human prion protein in the absence and in the presence of crowding agents as determined by ThT binding assays at 37 °C.** Best-fit values of these kinetic parameters were derived from non-linear least squares modeling of a sigmoidal equation and the Hill function to the data plotted in Fig. 2A. Errors shown are standard errors of the mean.

| [Crowding agent] (g/l) | $k$ (h <sup>-1</sup> ) | $t_m$ (h)   | Lag time (h) | $t_{50}$ (h) | $F(\infty)$ |
|------------------------|------------------------|-------------|--------------|--------------|-------------|
| 0                      | 1.51 ± 0.07            | 7.38 ± 0.04 | 6.06 ± 0.10  | 7.39 ± 0.03  | 127 ± 1     |
| 50                     | 1.46 ± 0.20            | 4.89 ± 0.11 | 3.52 ± 0.30  | 4.85 ± 0.09  | 124 ± 3     |
| Ficoll 70              | 100                    | 2.25 ± 0.19 | 2.89 ± 0.04  | 2.90 ± 0.02  | 150 ± 1     |
|                        | 150                    | 6.29 ± 1.07 | 1.17 ± 0.03  | 1.16 ± 0.03  | 209 ± 7     |
|                        | 200                    | 6.64 ± 1.15 | 1.11 ± 0.03  | 0.81 ± 0.08  | 1.09 ± 0.03 |

**TABLE S3**

**Kinetic parameters for amyloid fibril formation of human  $\alpha$ -synuclein in the absence and in the presence of crowding agents as determined by ThT binding assays at 37 °C.** Best-fit values of these kinetic parameters were derived from non-linear least squares modeling of a sigmoidal equation and the Hill function to the data from Uversky and co-worker's study of amyloid formation of human  $\alpha$ -synuclein (32). Errors shown are standard errors of the mean.

| [Crowding agent] (g/l) | $k$ (h <sup>-1</sup> ) | $t_m$ (h)   | Lag time (h) | $t_{50}$ (h) |           |
|------------------------|------------------------|-------------|--------------|--------------|-----------|
| Absence                | 0.20 ± 0.01            | 34.7 ± 0.2  | 24.7 ± 0.7   | 35.0 ± 0.2   |           |
| Dextran 138            | 0.28 ± 0.01            | 16.5 ± 0.2  | 9.36 ± 0.46  | 16.4 ± 0.2   |           |
| 150 g/l                | Ficoll 70              | 0.43 ± 0.02 | 8.80 ± 0.12  | 4.15 ± 0.34  | 8.6 ± 0.1 |
|                        | Ficoll 400             | 0.40 ± 0.02 | 7.35 ± 0.12  | 2.35 ± 0.37  | 7.0 ± 0.1 |
